# Supplementary material for: Quantification of drug loading in polymeric nanoparticles using AFM-IR technique: a novel method to map and evaluate drug distribution in drug nanocarriers
Source: Royal Society of Chemistry journal article supplement (doi:10.1039/d2an01079h), 2022-01-01
Supplement: d2an01079h1.pdf [file d2an01079h1.pdf]

## Supporting information

### Quantification of drug loading in polymeric nanoparticles using AFM-IR technique: a novel method to map and evaluate drug distribution in drug nanocarriers

M. Seray Ural, Emmanuel Dartois, Jérémie Mathurin, Didier Desmaële, Philippe Collery, Alexandre Dazzi, Ariane Deniset-Besseau, Ruxandra Gref

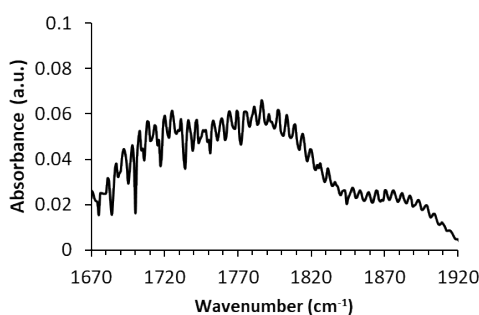

**Figure SI 1.** Power of QCL laser in function of the wavenumber recorded with a power meter and used as background for the local spectra recorded in AFM-IR

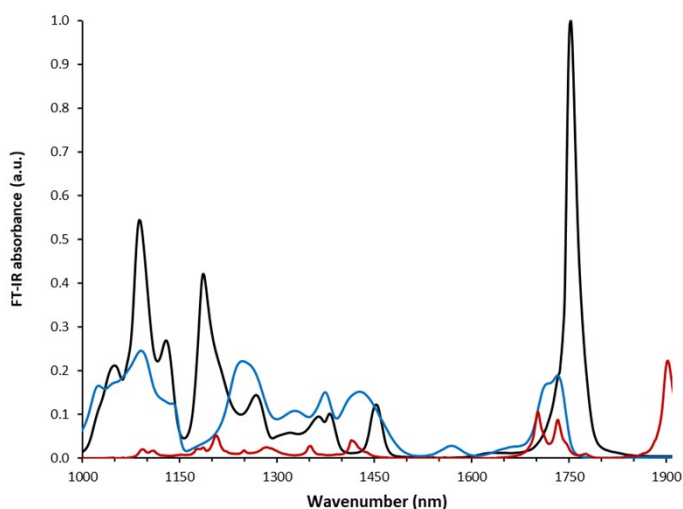

**Figure SI 2.** ATR-FTIR spectra of the compounds used to prepare films and/or NPs; PLA (black), PVA (blue), drug (red).

PLA has a characteristic  $\text{CH}_3$  group appearing at 1068 and 1133  $\text{cm}^{-1}$ . The bands at 1090 and 1188  $\text{cm}^{-1}$  correspond to the C-O-C ester bond stretching. Furthermore, C-H bending bands are found in the region 1300-1500  $\text{cm}^{-1}$ . The band at 1760  $\text{cm}^{-1}$  was attributed to stretching of the C=O of carboxylic acid group. For PVA, the characteristic absorption bands are identified for C=O at 1724  $\text{cm}^{-1}$ , and for CH bending at 1415  $\text{cm}^{-1}$  CH<sub>2</sub> wagging was at 1390  $\text{cm}^{-1}$ , CH wagging at 1268  $\text{cm}^{-1}$ , C-C and C-O-C stretching at 1151  $\text{cm}^{-1}$ , C=O stretching at 1106  $\text{cm}^{-1}$  and C-O stretching at 1045  $\text{cm}^{-1}$ . In addition, C=O of carboxylic acid group of the drug was at 1699 and 1729  $\text{cm}^{-1}$  and strong CO stretching bands were found in the region at 1900  $\text{cm}^{-1}$ .

**Table S11.** Comparison of calibration curves performed with AFM-IR and IR microscopy on the films prepared with known concentrations. Standard deviations are less than 0.01.

**Ratio of intensities ( $I_{1900}/I_{1760}$ )**

| Calibration technique | F(0) | F(0.03) | F(0.10) | F(0.15) | F(0.20) | Slope |
|-----------------------|------|---------|---------|---------|---------|-------|
| IR micro-spectroscopy | 0    | 0.03    | 0.05    | 0.08    | 0.12    | 0.57  |
| AFM-IR                | 0    | 0.08    | 0.15    | 0.23    | 0.25    | 1.40  |

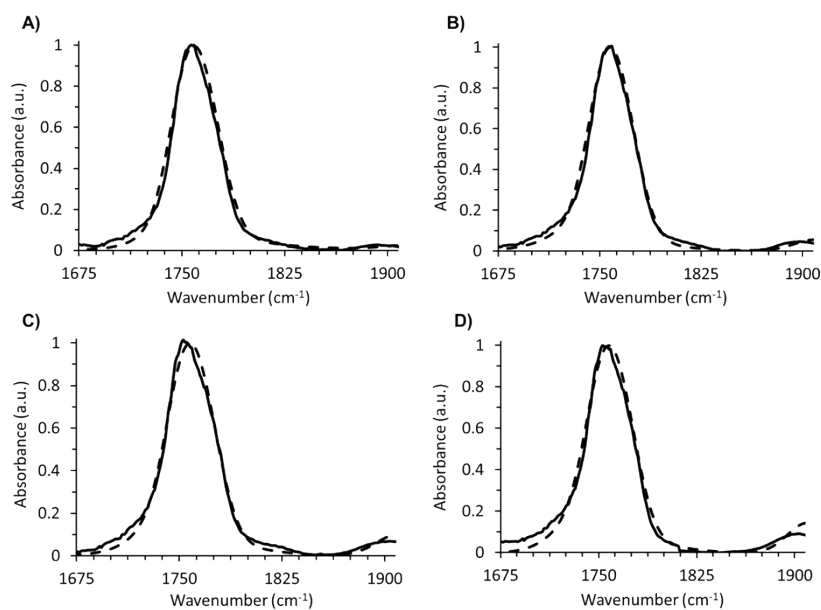

**Figure S13.** Comparison of AFM-IR spectra (solid line) to IR-Mic spectra (dashed lines) of films A) F(0.03), B) F(0.10), C) F(0.15) and D) F(0.20). A scaling factor of 2.7 was applied to AFM-IR.
